# Supplementary material for: Tissue Adhesive, Conductive, and Injectable Cellulose Hydrogel Ink for On-Skin Direct Writing of Electronics
Source: MDPI journal article supplement (doi:10.3390/gels8060336), 2022-05-30
Supplement: s1 [file s1]

Article

# Tissue-Adhesive, Conductive, and Injectable Cellulose Hydrogel Ink for On-Skin Direct Writing of Electronics

Subin Jin <sup>1</sup>, Yewon Kim <sup>2</sup>, Donghee Son <sup>2,3,4,\*</sup> and Mikyung Shin <sup>1,4,5,\*</sup>

<sup>1</sup> Department of Intelligent Precision Healthcare Convergence, Sungkyunkwan University (SKKU), Suwon 16419, Korea; subinjin@g.skku.edu

<sup>2</sup> Department of Electrical and Computer Engineering, Sungkyunkwan University (SKKU), Suwon 16419, Korea; ywkim0726@gmail.com

<sup>3</sup> Department of Superintelligence Engineering, Sungkyunkwan University (SKKU), Suwon 16419, Korea

<sup>4</sup> Center for Neuroscience Imaging Research, Institute for Basic Science (IBS), Suwon 16419, Korea

<sup>5</sup> Department of Biomedical Engineering, Sungkyunkwan University (SKKU), Suwon 16419, Korea

\* Correspondence: daniel3600@g.skku.edu (D.S.); mikyungshin@g.skku.edu (M.S.)

## Supplementary Materials

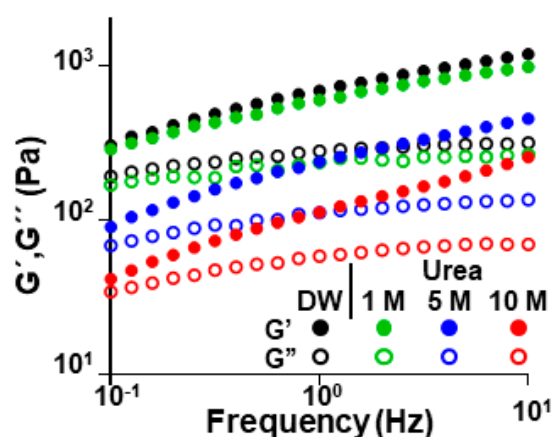

**Figure S1.** Evaluation and comparison of storage modulus ( $G'$ ) and loss modulus ( $G''$ ) due to hydrogen bond collapse between CMC and TA due to disruption of hydrogen bond by various concentration of urea.

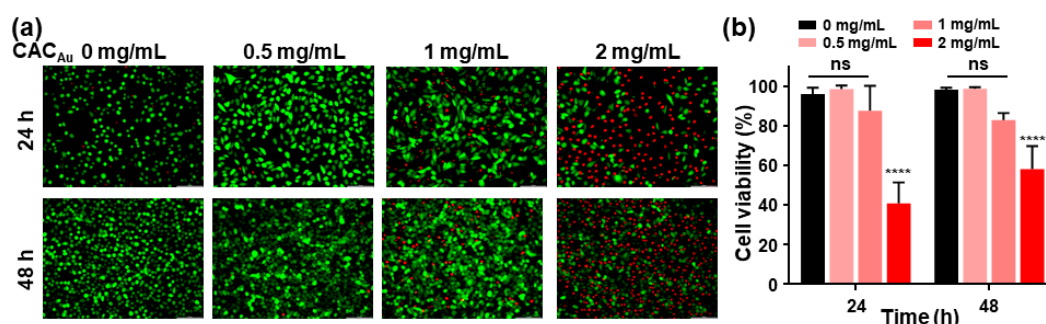

**Figure S2.** In vitro cytocompatibility of  $CAC_{Au}$ . (a) The fluorescent images of L929 cells at 24 and 48 hours after treatment of the  $CAC_{Au}$  releasates as a function of concentration (0, 0.5, 1, and 2 mg/mL). (b) Quantitative analysis of the cell viability. All data are expressed as mean  $\pm$  s.d. One-way ANOVA, \*\*\*\* $p < 0.0001$ , and ns for not significant.

**Movie S1.** The stability of the on-tissue printed filaments upon soaking in PBS and against physical deformation of porcine skin.
